# Supplementary material for: Autophagy acts as a brake on obesity-related fibrosis by controlling purine nucleoside signalling
Source: Springer Nature journal article supplement (doi:10.1038/s41467-025-64266-5), 2025-10-17
Supplement: MOESM1 [file 41467_2025_64266_MOESM1_ESM.pdf › 41467_2025_64266_MOESM1_ESM.pdf]

## SUPPLEMENTARY INFORMATION

### **Autophagy acts as a brake on obesity-related fibrosis by controlling purine nucleoside signalling**

*Klara Piletic<sup>1</sup>, Amir H. Kayvanjoo<sup>2,3,#</sup>, Felix Clemens Richter<sup>1,#</sup>, Mariana Borsa<sup>1,\$</sup>, Ana V. Lechuga-Vieco<sup>1,\$</sup>, Oliver Popp<sup>2</sup>, Sacha Grenet<sup>1,4</sup>, Jacky Ka Long Ko<sup>5</sup>, Lin Luo<sup>1,6</sup>, Kristina Zec<sup>1</sup>, Maria Kyriazi<sup>7</sup>, Harriet K. Haysom<sup>1</sup>, Lada Koneva<sup>1</sup>, Stephen Sansom<sup>1</sup>, Philipp Mertins<sup>2</sup>, Fiona Powrie<sup>1</sup>, Ghada Alsaleh<sup>7,Φ</sup>, Anna Katharina Simon<sup>1,2,Φ\*</sup>*

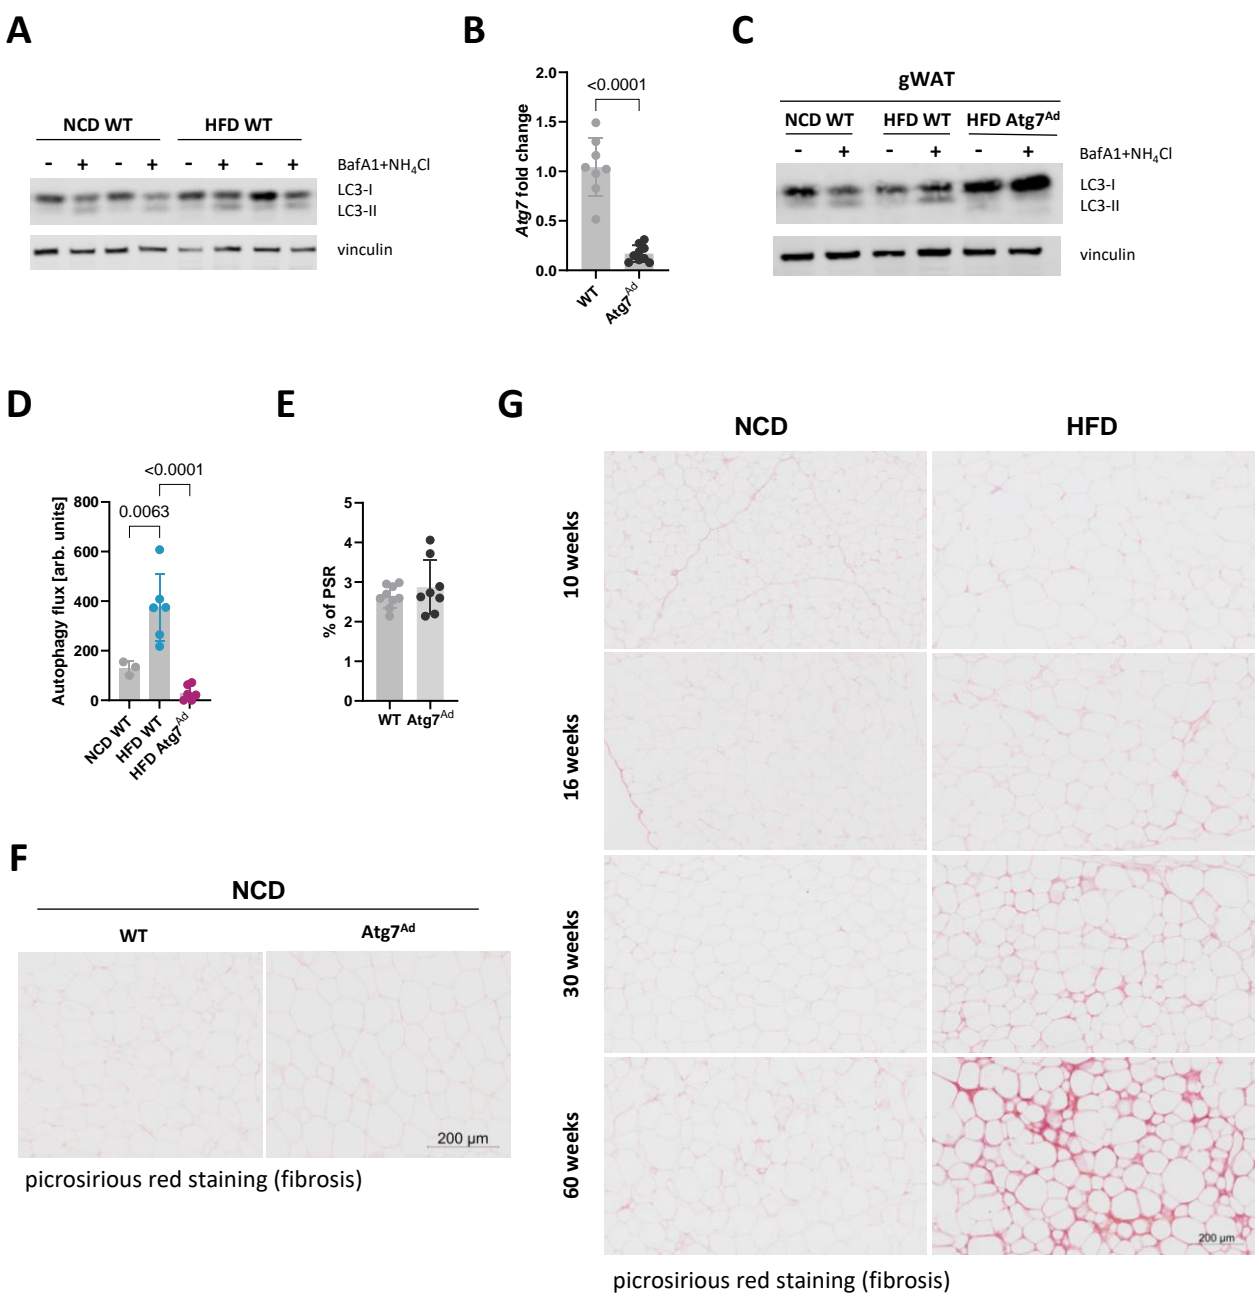

**Supplementary Figure 1: Assessment of autophagy flux and fibrosis in obesity and validation of *Atg7<sup>Ad</sup>* mouse model.**

A) A representative western blot analysis of LC3-I, LC3-II, and vinculin in gWAT to measure autophagy flux. WT mice were fed a normal chow diet (NCD) or high fat diet (HFD) for 10, 30 and 60 weeks. An example western blot is shown for 30 weeks of altered diet.

B) Relative mRNA expression of *Atg7* in gWAT of WT and *Atg7<sup>Ad</sup>* mice measured by qRT-PCR. n = 8 (WT) and 9 (*Atg7<sup>Ad</sup>*) mice.

C) A representative western blot analysis of LC3-I, LC3-II, and vinculin in gWAT to measure autophagy flux. WT and *Atg7<sup>Ad</sup>* mice were fed a normal chow diet (NCD) or high fat diet (HFD) for 16 weeks.

D) WT and *Atg7<sup>Ad</sup>* mice were fed a normal chow diet (NCD) or high fat diet (HFD) for 16 weeks before autophagy flux in gWAT was assessed as explained in Materials and Methods. Western blot analysis of autophagy flux (as in B) was calculated as (LC3-II (Inh) – LC3-II (Veh)). n = 3 (NCD) and 6 (HFD) mice.

E) Quantification of picrosirius red positive area as a percentage of the total area of stained gWAT. n = 8 (*Atg7<sup>Ad</sup>*) and 9 (WT) mice.

F) Picrosirius red staining (PSR), specifically staining collagen I and III, of gWAT depots harvested from NCD-fed WT and *Atg7<sup>Ad</sup>* mice after 16 weeks of feeding. Scale bar, 200  $\mu$ m.

G) PSR staining of gWAT depots harvested from NCD and HFD-fed WT mice after 10, 30, and 60 weeks of feeding. Scale bar, 200  $\mu$ m.

Data are presented as mean  $\pm$  SD. Dots represent individual biological replicates. Data are representative (A, C-D, F-G) or merged from 3 independent experiments (B, E). Statistical analysis by unpaired t-test (B) and one-way ANOVA with Tukey multiple comparisons test (D).

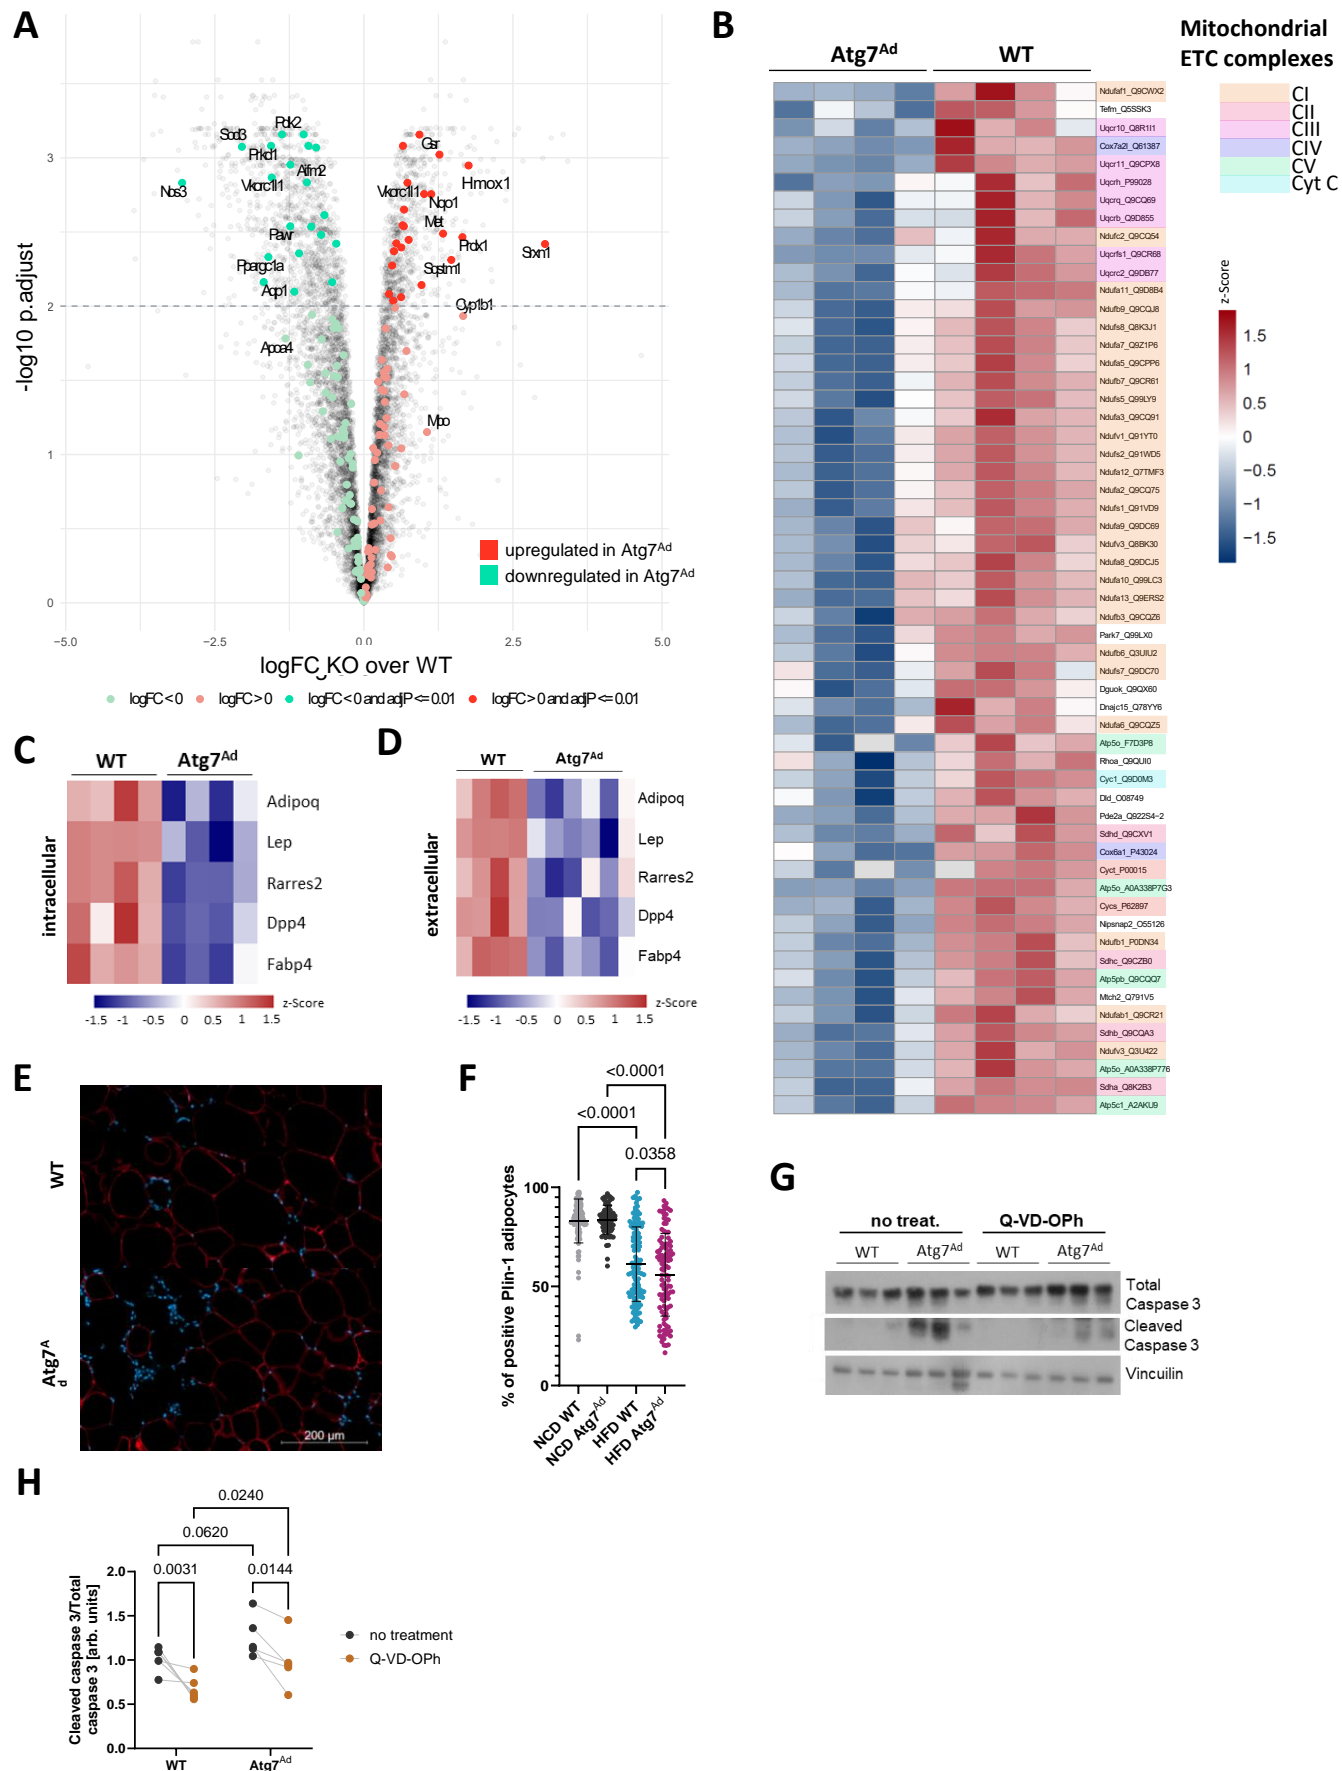

A) Volcano plot of cellular response to oxidative stress (GO:0034599). n = 4 mice.

B) Heatmap of OXPHOS biological process (GO:0006119). Proteins belonging to different mitochondrial complexes are colour-coded. Values were scaled by row (protein) using z-score. n = 4 mice.

C-D) Heatmap showing intracellular (C) and extracellular (D) adipokine accumulation. Lep = leptin, Adipoq = adiponectin. Values were scaled by row (protein) using z-score. n = 4 mice.

E-F) Representative immunofluorescence staining of Perilipin-1 on gWAT sections from WT and *Atg7<sup>Ad</sup>* mice following HFD feeding for 16 weeks (E). Quantification of Perilipin-1 staining as a percentage of Perilipin-1 positive adipocytes compared to total area (F) from (E). Legend: blue = dapi, red = Perilipin-1. n = 7 (NCD) and 8 (HFD) mice, each section quantified across multiple areas of interest.

G-H) Cleaved caspase 3 was assessed by western blot analysis in gWAT explants cultured overnight *ex vivo* and treated with either DMSO or 20  $\mu$ M Q-VD-OPh, a pan-caspase inhibitor. gWAT was isolated from WT and *Atg7<sup>Ad</sup>* mice fed with HFD for 16 weeks. G) Representative western blot analysis of total caspase 3, cleaved caspase 3, and vinculin in gWAT to measure apoptosis. H) Quantification of cleaved caspase 3 compared to total caspase 3 quantified from blots in (G). n = 5 (*Atg7<sup>Ad</sup>*) and 6 (WT) mice.

Dots represent individual biological replicates. Data are representative (E, G) or merged from 2-3 independent experiments (F, H). Statistical analysis by Tukey's multiple comparisons test (F) or uncorrected Fisher's LSD test (H).

**A**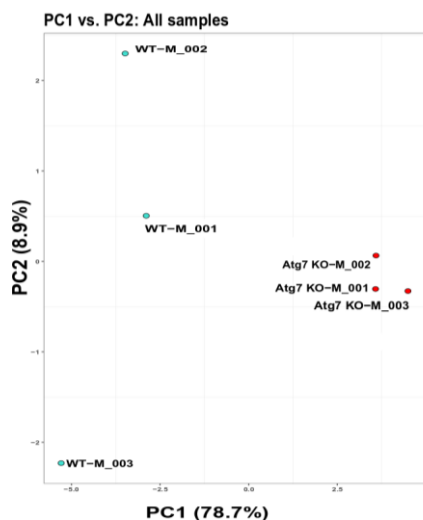**B**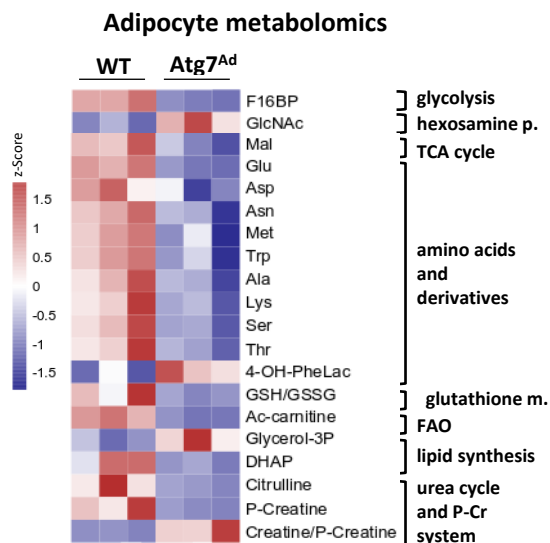**C**

### Adipocyte metabolomics

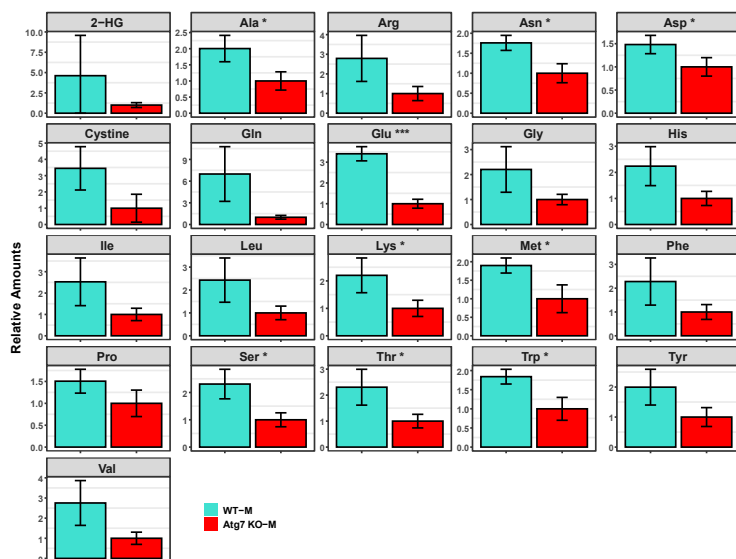**D**

### Adipocyte proteomics

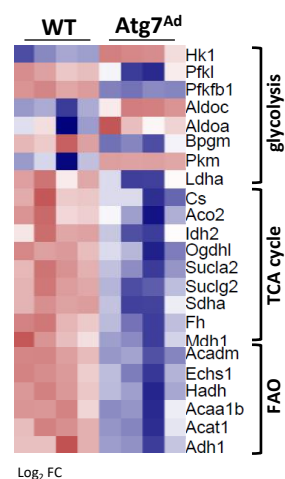**E**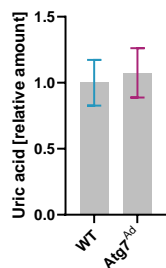**F**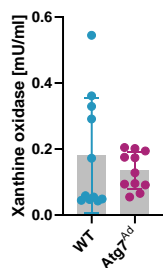**G**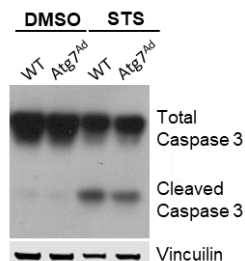**H**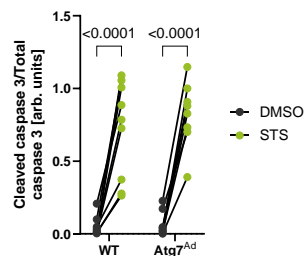

## Supplementary Figure 3: Metabolomics analysis reveals a prominent role of autophagy in amino acid metabolism.

A) Principal component analysis (PCA) representation of metabolomics analysis. n = 3 mice per genotype, males only.

B) Z-score heatmap of significantly ( $p < 0.05$ ) abundant metabolites in adipocytes. Metabolomics analysis was performed on adipocytes isolated from gWAT of WT and *Atg7<sup>Ad</sup>* mice following HFD feeding for 16 weeks.  $n = 3$  mice.

C) Relative abundance of amino acids measured with metabolomics analysis in adipocytes isolated from gWAT of WT and *Atg7<sup>Ad</sup>* mice following HFD feeding for 16 weeks.  $n = 3$  mice.

D) Log<sub>2</sub> fold change heatmap of significantly differentially abundant proteins between WT and *Atg7<sup>Ad</sup>* involved in glycolysis, TCA cycle and FAO in adipocytes as measured by proteomics analysis.  $n = 4$  mice.

E) Relative abundance of uric acid measured with metabolomics analysis in adipocytes isolated from gWAT of WT and *Atg7<sup>Ad</sup>* mice following HFD feeding for 16 weeks.  $n = 3$  mice.

F) Activity of xanthine oxidase (XO) after 2-hour incubation with WT and *Atg7<sup>Ad</sup>* adipocyte lysates.  $n = 11$  mice.

G-H) WT and *Atg7<sup>Ad</sup>* mice were fed HFD for 16 weeks. gWAT explants were cultured over 24 hours *ex vivo* while treated with either DMSO or 10  $\mu$ M staurosporine (STS), an apoptosis inducer. G) Representative western blot analysis of total caspase 3, cleaved caspase 3, and vinculin in gWAT. H) Cleaved caspase 3 to measure apoptosis was quantified from blots in (G).  $n = 8$  (*Atg7<sup>Ad</sup>*) and 9 (WT) mice.

All heatmap values were scaled by row (protein/metabolite) using z-score. Data are presented as mean  $\pm$  SD. Dots represent individual biological replicates. Data are representative (G) or merged from 3 independent experiments (F, H). Statistical analysis by two-way ANOVA with Šídák multiple comparisons test (H).

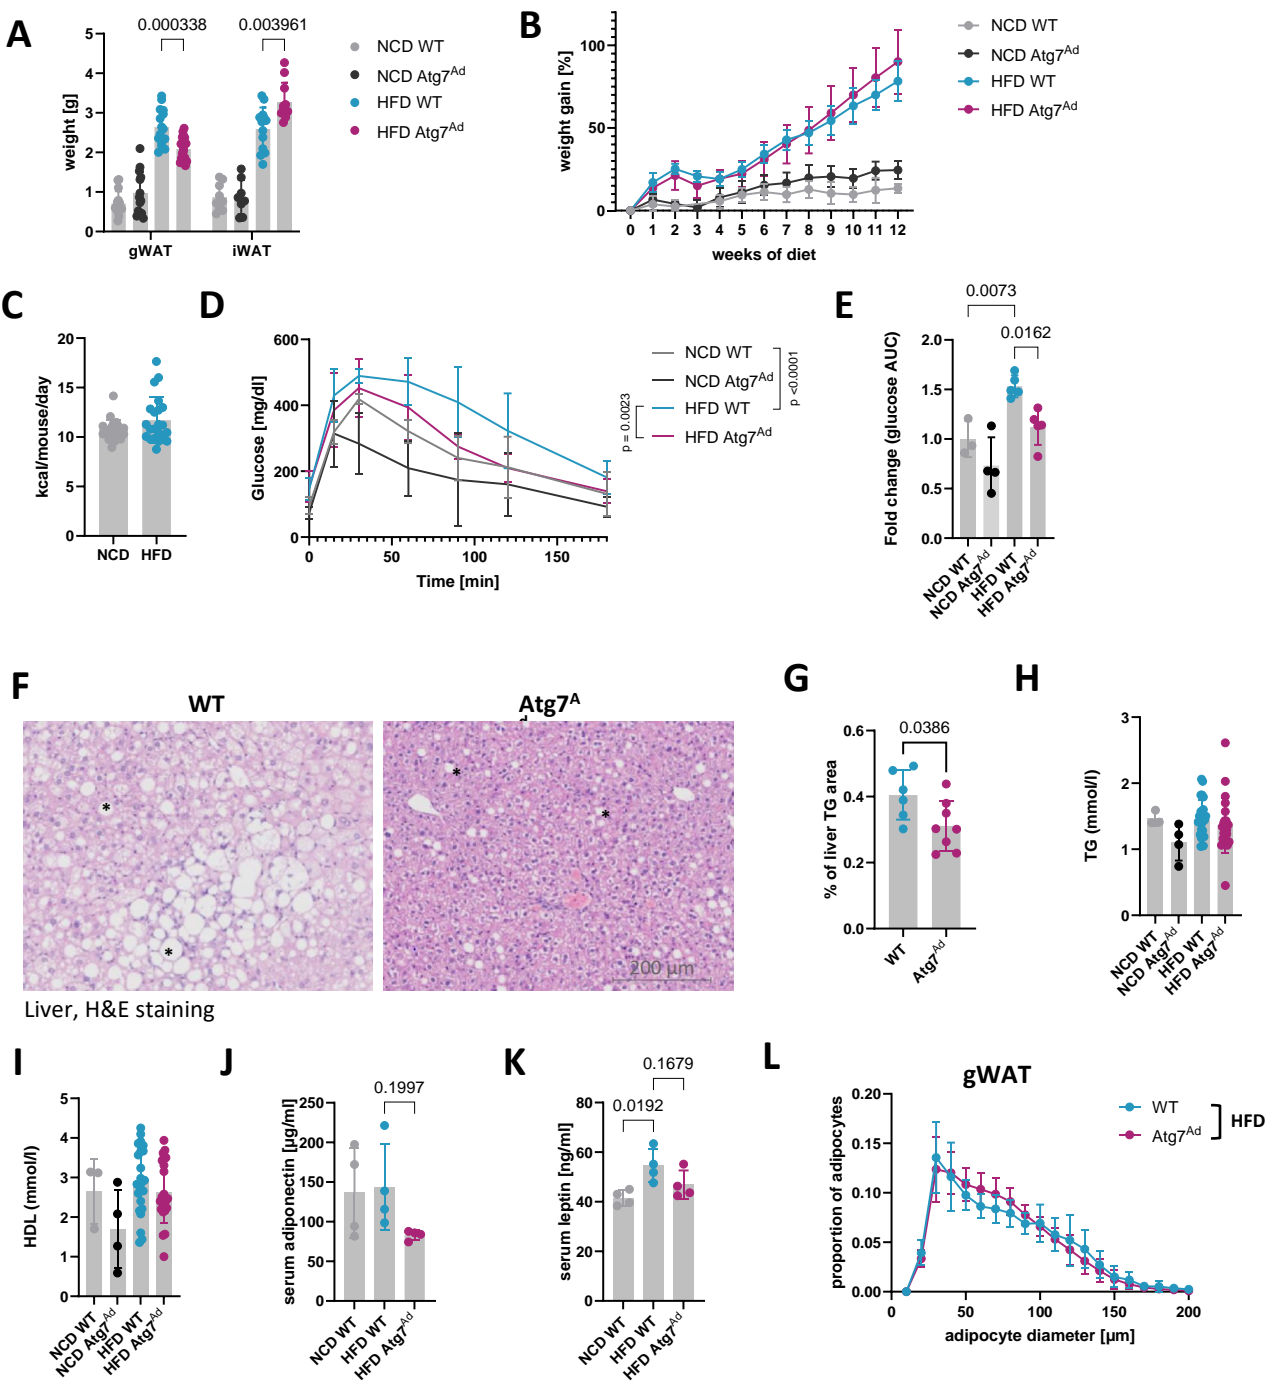

**Supplementary Figure 4: The absence of adipocyte autophagy ameliorates metabolic syndrome in diet-induced obese mice.**

WT and *Atg7<sup>Δd</sup>* mice were fed normal chow diet (NCD) or high fat diet (HFD) for 12-16 weeks prior to analysis.

A) Fat pad weight. n = 8 (iWAT NCD *Atg7<sup>Δd</sup>*), 9 (iWAT NCD WT), 11 (iWAT HFD *Atg7<sup>Δd</sup>*), 13 (iWAT HFD WT) and 15 (gWAT) mice.

B) Weight gain relative to starting weight over 12 weeks of NCD or HFD feeding. n = 4 mice.



C) Caloric food intake between NCD and HFD-fed mice. n = 22 mice.

D) Glucose tolerance test performed at 12 weeks of HFD feeding. n = 4 mice.

E) Area under the curve (AUC) for glucose tolerance test for (E).

F) H&E staining of liver harvested from HFD-fed WT and *Atg7<sup>Ad</sup>* mice after 16 weeks of feeding. Examples of fat deposition marked with an asterisk, scale bar, 200  $\mu$ m.

G) Quantification of white (lipid) area from G. n = 6 (WT) and 8 (*Atg7<sup>Ad</sup>*) mice.

H-K) Serum concentration of triglycerides (TG, H), high-density lipoprotein (HDL, I), adiponectin (J), and leptin (K). n = 3 (H – NCD WT, I – NCD WT), 4 (H – NCD *Atg7<sup>Ad</sup>*, I – NCD *Atg7<sup>Ad</sup>*, J, K), 22 (H – HFD *Atg7<sup>Ad</sup>*, I – HFD *Atg7<sup>Ad</sup>*) and 24 (H – HFD WT, I – HFD WT) mice.

L) Quantification of adipocyte number and diameter in gWAT from HFD-fed mice. n = 6 mice.

Data are presented as mean  $\pm$  SD. Dots represent individual data points. Data are representative (B, D-F) or merged from 2-3 independent experiments (A, C, G-K, L). Statistical analysis by multiple unpaired t tests (A), two-way ANOVA with Tukey multi comparisons test (D, E), unpaired t-test (G), and one-way ANOVA (J-K).



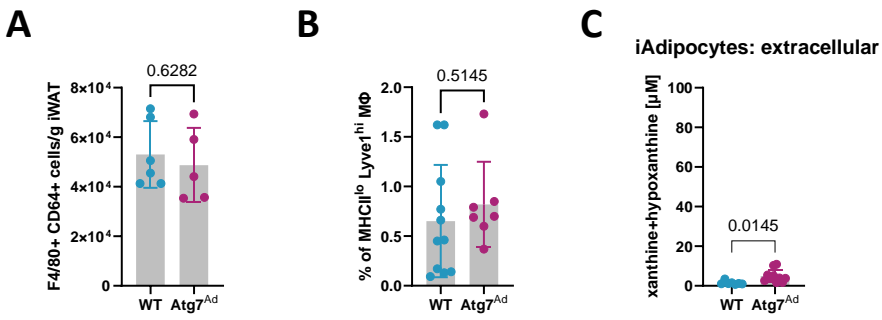

**Supplementary Figure 6: *Atg7<sup>Ad</sup>* iWAT lacks macrophage accumulation and shows modest but significantly increased xanthine and hypoxanthine secretion.**

A) Flow cytometry analysis of F4/80<sup>+</sup> CD64<sup>+</sup> macrophage number in iWAT. n = 5 (*Atg7<sup>Ad</sup>*) and 6 (WT) mice.

B) Quantification of perivascular macrophages identified as MHCII<sup>low</sup> Lyve1<sup>high</sup> by flow cytometry presented as frequency of total macrophages. n = 7 (*Atg7<sup>Ad</sup>*) and 11 (WT) mice.

C) Concentration of xanthine and hypoxanthine secreted from iWAT adipocytes cultured over 24 hours *ex vivo*. Adipocytes were isolated from WT and *Atg7<sup>Ad</sup>* mice fed with HFD for 16 weeks. n = 7 (WT) and 10 (*Atg7<sup>Ad</sup>*) mice.

Data are presented as mean ± SD. Dots represent individual biological replicates. Data are representative (A) or merged from 3 independent experiments (B-C). Statistical analysis by unpaired t-test (A-C).

# Supplementary Table 1: Materials and resources used in this study.

| Antibodies                                                             | Source                     | Identifier  |
|------------------------------------------------------------------------|----------------------------|-------------|
| Rabbit anti-LC3 (1:1500)                                               | Sigma-Aldrich              | L8918       |
| Rabbit anti-vinculin (1:2000)                                          | Cell Signalling Technology | 13901       |
| Rabbit anti-caspase 3 (1:1000)                                         | Cell Signalling Technology | 9662        |
| Rabbit IR Dye 800 CW (1:10000)                                         | LI-COR                     | 926-32211   |
| BV510 anti-mouse CD45, clone 30-F11 (1:200)                            | BD Biosciences             | 563891      |
| PE-Cyanine7 anti-mouse CD31, clone 390 (1:200)                         | Invitrogen                 | 25-0311-81  |
| PE anti-mouse CD140a (PDGFRa), clone APA5 (1:200)                      | Biolegend                  | 135905      |
| PerCP anti-mouse CD45, clone 30-F11 (1:200)                            | Biolegend                  | 103130      |
| BV785 anti-mouse/human CD11b, clone M1/70 (1:200)                      | Biolegend                  | 101243      |
| BV605 anti-mouse F4/80, clone BM8 (1:200)                              | Biolegend                  | 123133      |
| BV711 anti-mouse CD64, clone X54-5/7.1 (1:200)                         | Biolegend                  | 139311      |
| PE anti-mouse CD170 (Siglec-F), clone S17007L (1:200)                  | Biolegend                  | 155505      |
| APC anti-mouse NK-1.1, clone PK136 (1:200)                             | Biolegend                  | 108709      |
| PE-Cyanine7 anti-mouse Ly6G, clone 1A8 (1:200)                         | Biolegend                  | 127618      |
| PE-Cyanine7 anti-mouse TCR b chain, clone H57-597                      | Biolegend                  | 109221      |
| BV785 anti-mouse CD19, clone 6D5 (1:200)                               | Biolegend                  | 115543      |
| BV421 anti-mouse CD3ε, clone 145-2C11 (1:200)                          | Biolegend                  | 100335      |
| Pacific Blue anti-mouse CD8a, clone 53.6.-7 (1:400)                    | Biolegend                  | 100725      |
| BV605 anti-mouse CD4, clone GK1.5 or RM4-5 (1:400)                     | Biolegend                  | 100451      |
| PE anti-mouse CD45.1, clone A20 (1:200)                                | Biolegend                  | 110707      |
| BV711 anti-mouse CD45.2, clone 104 (1:200)                             | Biolegend                  | 109847      |
| APC anti-mouse CD9, clone MZ3 (1:200)                                  | Biolegend                  | 124811      |
| PerCP/Cyanine5.5 anti-mouse CD63, clone NVG-2 (1:200)                  | Biolegend                  | 143911      |
| eFluor450 anti-mouse Lyve1, clone ALY7 (1:200)                         | Invitrogen                 | 48-0443-82  |
| PerCP/Cyanine5.5 anti-mouse I-A/I-E (MHCII), clone M5/114.15.2 (1:200) | Biolegend                  | 107626      |
| Mouse CD16/32 (1:200)                                                  | Biolegend                  | 101302      |
| Mouse anti-CD45 (1:500)                                                | R&D Systems                | AF114       |
| Rabbit anti-CD68 (1:100)                                               | Abcam                      | ab125212    |
| Rat anti-F4/80 (1:100)                                                 | BioRad                     | MCA497A488T |
| Rabbit anti-Perilipin 1 (D1D8) (1:100)                                 | Cell Signalling Technology | 9349        |
| Donkey Anti-Rat IgG H&L (Alexa Fluor 647) (1:500)                      | Abcam                      | ab150155    |
| Donkey Anti-Rabbit IgG H&L (Alexa Fluor 555) (1:500)                   | Abcam                      | ab150074    |
| Mouse FcR blocking reagent (1:200)                                     | Miltenyi Biotec            | 130-092-575 |
| Chemicals                                                              |                            |             |
| Tamoxifen                                                              | Sigma-Aldrich              | T5648       |
| DMEM high glucose medium                                               | Sigma-Aldrich              | D5796       |
| RPMLI-1640 medium                                                      | Sigma-Aldrich              | R8758       |
| RBC Lysis buffer                                                       | Invitrogen                 | 00-4333-57  |
| Phosphate buffered saline (PBS)                                        | Gibco                      | 10010-023   |
| Fatty acid-free BSA                                                    | Sigma-Aldrich              | 126609      |
| HEPES                                                                  | Gibco                      | 15630-056   |
| Liberase TL                                                            | Roche                      | 5401020001  |
| DNaseI                                                                 | Roche                      | 11284932001 |
| EDTA                                                                   | Invitrogen                 | 15575-038   |
| PBS 10X                                                                | VWR                        | 437117K     |
| TRI reagent                                                            | Sigma-Aldrich              | T9424       |
| cOmplete ULTRA tablets                                                 | Roche                      | 5892791001  |
| PhosSTOP                                                               | Roche                      | 4906845001  |
| BSA                                                                    | Sigma-Aldrich              | A7030       |
| Skim milk powder                                                       | Sigma-Aldrich              | 70166       |
| Prestained protein ladder                                              | Abcam                      | ab116028    |
| NuPAGE 4-12% Bis-Tris Gel                                              | Invitrogen                 | NP0336BOX   |
| NuPAGE MES SDS running buffer                                          | Invitrogen                 | NP0002      |
| NuPAGE Transfer buffer                                                 | Invitrogen                 | NP0006-1    |
| Hypoxanthine                                                           | Sigma-Aldrich              | H9636       |
| Xanthine                                                               | Sigma-Aldrich              | X7375       |
| Adenosine                                                              | Sigma-Aldrich              | F09333      |
| Guanosine                                                              | Sigma-Aldrich              | G6264       |
| Forodesine hydrochloride                                               | MedChemExpress             | HY-16209    |
| Q-VD-OPh                                                               | MedChemExpress             | HY-12305    |

|                                                          |                      |              |
|----------------------------------------------------------|----------------------|--------------|
| Citrate antigen retrieval solution (ARS1)                | Vector Laboratories  | H-3300       |
| DAPI stock solution                                      | ThermoFisher         | D3571        |
| Donkey serum                                             | Sigma-Aldrich        | D9663        |
| Ethanol                                                  | Sigma-Aldrich        | 32221-2.5L   |
| Glycerol                                                 | Sigma-Aldrich        | G5516        |
| Triton X-100                                             | Sigma-Aldrich        | T9284        |
| Trizma base                                              | Sigma-Aldrich        | T6066        |
| Xylene                                                   | Sigma-Aldrich        | 534056       |
| Picro-sirius red solution                                | Abcam                | ab24683      |
| Haematoxylin Harris                                      | Leica microsystems   | 3801560E     |
| HCl 37%                                                  | VWR                  | 20253.335    |
| Eosin Y                                                  | Cell Path            | RBC-0100-00A |
| Di-n-butylphthalate mounting media                       | Sigma-Aldrich        | 06522-100ml  |
| Formalin solution, neutral buffered, 10%                 | Sigma-Aldrich        | HT501128     |
| Paraformaldehyde, 16% w/v aq. soln.                      | ThermoFisher         | 043368.9M    |
| Calibrite 2-color beads                                  | BD Biosciences       | 349502       |
| D-(+)-Glucose                                            | Sigma-Aldrich        | G8270        |
| Sucrose                                                  | Sigma-Aldrich        | S9378        |
| Methanol (Optima* LC/MS)                                 | ThermoFisher         | A456-1       |
| Water                                                    | ThermoFisher         | W5-1         |
| Chloroform, Reagent ACS 99.8%, ACROS Organics            | ThermoFisher         | 423550010    |
| Chromacol™ GOLD-Grade Inert Glass Vials                  | ThermoFisher         | 13-622-351   |
| 9 mm autosampler vial screw thread caps (PTFE, silicone) | ThermoFisher         | 03-379-123   |
| Sodium deoxycholate                                      | Sigma-Aldrich        | N/A          |
| Dithiothreitol                                           | Sigma-Aldrich        | N/A          |
| Chloroacetamide                                          | Sigma-Aldrich        | N/A          |
| Lysyl Endopeptidase, mass spectrometry grade (LysC)      | Wako                 | 125-05061    |
| Trypsin, sequence grade                                  | Promega              | VA9000       |
| <b>Commercial assays</b>                                 |                      |              |
| RNeasy Plus Micro Kit                                    | Qiagen               | 74034        |
| RNeasy Mini Kit                                          | Qiagen               | 74106        |
| High-capacity RNA-to-cDNA kit                            | Applied Biosystems   | 4387406      |
| TaqMan Fast Advanced master mix                          | Applied Biosystems   | 4444557      |
| LIVE/DEAD fixable near-IR dead cell stain kit            | Invitrogen           | L34976       |
| LIVE/DEAD fixable aqua dead cell stain kit               | Invitrogen           | L34966       |
| BCA assay                                                | ThermoFisher         | 23227        |
| IL1 beta mouse ELISA kit                                 | Invitrogen           | 88-7013A-88  |
| IL-10 mouse ELISA kit                                    | Invitrogen           | 88-7105-86   |
| IL-6 mouse ELISA kit                                     | Invitrogen           | 88-7064-88   |
| TGF beta-1 human/mouse ELISA kit                         | Invitrogen           | 88-8350-88   |
| TNF alpha mouse ELISA kit                                | Invitrogen           | 88-7324-88   |
| Adiponectin mouse ELISA kit                              | Invitrogen           | KMP0041      |
| Mouse Magnetic Luminex Assay (OPN)                       | Luminex              | LXSAMSM      |
| Leptin mouse ELISA kit                                   | Invitrogen           | KMC2281      |
| Xanthine/Hypoxanthine Assay Kit                          | Abcam                | ab155900     |
| ATP Bioluminescence Assay Kit CLS II                     | Roche                | 11699695001  |
| Amplex™ Red Xanthine/Xanthine Oxidase Assay Kit          | Invitrogen           | A22182       |
| CD11b MicroBeads, human and mouse                        | Miltenyi Biotec      | 130-049-601  |
| Alexa Fluor 488 antibody labeling kit                    | Invitrogen           | A20181       |
| <b>Deposited data</b>                                    |                      |              |
| RNA-seq                                                  | This paper           | GSE263837    |
| proteomics                                               | This paper           | PXD052894    |
| <b>Experimental models</b>                               |                      |              |
| Mouse: Adipoq-Cre                                        | Charles River        | 25124        |
| Mouse: Atg7 <sup>fl/fl</sup>                             | Komatsu et al., 2005 | N/A          |
| C57BL/6                                                  | bred in-house        | N/A          |

| Oligonucleotides                                           |                       |                                                                     |
|------------------------------------------------------------|-----------------------|---------------------------------------------------------------------|
| Col1a1                                                     | ThermoFisher          | Mm00801666_g1                                                       |
| Col3a1                                                     | ThermoFisher          | Mm01254476_m1                                                       |
| Col6a3                                                     | ThermoFisher          | Mm00711678_m1                                                       |
| Fn1                                                        | ThermoFisher          | Mm01256744_m1                                                       |
| Mmp14                                                      | ThermoFisher          | Mm00485054_m1                                                       |
| Timp1                                                      | ThermoFisher          | Mm01341361_m1                                                       |
| Acta2                                                      | ThermoFisher          | Mm00725412_s1                                                       |
| Il1b                                                       | ThermoFisher          | Mm00434228_m1                                                       |
| Ppia                                                       | ThermoFisher          | Mm02342430_g1                                                       |
| Software and algorithms                                    |                       |                                                                     |
| R                                                          | R Project Team        | <a href="https://www.r-project.org/">https://www.r-project.org/</a> |
| Prism 10                                                   | GraphPad              | <a href="https://www.graphpad.com/">https://www.graphpad.com/</a>   |
| FlowJo v10.8.0                                             | FlowJo                | <a href="https://www.flowjo.com/">https://www.flowjo.com/</a>       |
| ImageJ                                                     | NIH                   | <a href="https://imagej.net/ij/">https://imagej.net/ij/</a>         |
| Zen 3.4                                                    | Zeiss                 | <a href="https://www.zeiss.com/">https://www.zeiss.com/</a>         |
| QuPath                                                     | Bankhead et al., 2017 | <a href="https://qupath.github.io/">https://qupath.github.io/</a>   |
| Excel                                                      | Microsoft             | <a href="https://www.office.com/">https://www.office.com/</a>       |
| Word                                                       | Microsoft             | <a href="https://www.office.com/">https://www.office.com/</a>       |
| PowerPoint                                                 | Microsoft             | <a href="https://www.office.com/">https://www.office.com/</a>       |
| Endnote                                                    | Endnote               | <a href="https://endnote.com/">https://endnote.com/</a>             |
| Other                                                      |                       |                                                                     |
| Rodent Diet with 60 kcal% Fat                              | ResearchDiets         | D12492i                                                             |
| Rodent Diet with 10 kcal% Fat (Matching Sucrose to D12492) | ResearchDiets         | D12450Ji                                                            |
| Glucose test strips                                        | Abott                 | 70815-71                                                            |
| Freedom Lite blood glucose monitoring system               | Abott                 | ART20776-101                                                        |
| Microtainer tubes                                          | BD Bioscience         | 365978                                                              |
| Microvette CB 300 LH                                       | Sarstedt              | 16.443                                                              |
| pluriStrainer 300 um                                       | pluriSelect           | 43-50300-01                                                         |
| Ceramic beads                                              | Bertin Instruments    | KT03961-1-003.2                                                     |
| MS columns                                                 | Miltenyi Biotec       | 130-042-201                                                         |
| LS columns                                                 | Miltenyi Biotec       | 130-042-401                                                         |
| 24-well TPP tissue culture plate                           | Merck                 | Z707791                                                             |
| Nunc MaxiSorp ELISA uncoated plates                        | Biolegend             | 423501                                                              |
| Cell DIVE multiplex imager                                 | GE                    | N/A                                                                 |
| Axioscan 7 microscope slide scanner                        | Zeiss                 | N/A                                                                 |
| Fortessa X-20 flow cytometer                               | BD Biosciences        | N/A                                                                 |
| NanoDrop                                                   | ThermoFisher          | N/A                                                                 |
| TissueLyser II                                             | Qiagen                | N/A                                                                 |
| Precellys 24 homogenizer                                   | Bertin Instruments    | N/A                                                                 |
| EZ2 Elite evaporator                                       | Genevac               | N/A                                                                 |
| EASY-nLC 1200                                              | ThermoFisher          | N/A                                                                 |
| Exploris 480                                               | ThermoFisher          | N/A                                                                 |
