# Supplementary material for: Autophagy acts as a brake on obesity-related fibrosis by controlling purine nucleoside signalling
Source: Nat Commun. 2025 Oct 17;16:9220. doi: 10.1038/s41467-025-64266-5 (PMC12534472; doi:10.1038/s41467-025-64266-5)
Supplement: Supplementary file 3 — Supplementary Data 1 [file 41467_2025_64266_MOESM3_ESM.xlsx]

## Sheet: description
	Supplementary Data: Adipocyte metabolomics data.
	Table contains the intensities (area under the curve or AUC) for all metabolites in the sample set (normalized to protein content), their abbreviated names (Name column) and KEGG IDs. Conditions are in a separate row, with three biological replicates per conditions denoted as Exp001 – 003. A one-way ANOVA statistical test has been applied (ANOVA column). Key to number of * in the Sig column: * p<…

## Sheet: metabolomics raw data_norm
Column1	Column2	Column3	Column4	Column5	Column6	Column7	Column8	Column9	Column10	Column11	Column12	Column13	Column14	Column15
Name	KEGG.ID	Condition	Av	Std	CV	Exp001	Exp002	Exp003	ANOVA	Sig	Av2	denom	Norm_Av	Norm_Std
2-AB	C02356	WT-M	33489.718524538	31722.2476145099	0.94722347669978	22627.1041434029	8625.75050062127	69216.3009295899	0.190363876611281		33489.718524538	4541.27053224561	7.37452620070572	6.98532434684609
2-AB	C02356	Atg7 KO-M	4541.27053224561	2663.81775387284	0.586579842570096	7364.53653616943	4186.89900653456	2072.37605403283	0.190363876611281		4541.27053224561	4541.27053224561	1	0.586579842570096
2-HG	C02630	WT-M	21991775.614369	23619472.8110894	1.07401390525542	8833540.65872569	7882124.75009613	49259661.4342853	0.275799471189647		21991775.614369	4762925.0805933	4.61728354787172	4.95902673492131
2-HG	C02630	Atg7 KO-M	4762925.0805933	1420640.86726877	0.29827067258673	6395691.29916567	3809515.22074058	4083568.72187365	0.275799471189647		4762925.0805933	4762925.0805933	1	0.29827067258673
2-Oxoadipate	C00322	WT-M	1309750.64016014	1537018.58604343	1.17352001130192	465782.311117199	379620.080066031	3083849.5292972	0.259463849530965		1309750.64016014	144259.077301473	9.07915581230998	10.6545710314739
2-Oxoadipate	C00322	Atg7 KO-M	144259.077301473	40403.9145844868	0.280078836911251	179261.025029797	100044.360622643	153471.846251979	0.259463849530965		144259.077301473	144259.077301473	1	0.280078836911251
2-Oxosuccinamate	C02362	WT-M	80124.5897160602	47853.9226711317	0.597243902785811	50237.3751926497	135318.212145941	54818.1818095896	0.79233072411661		80124.5897160602	80124.5897160602	1	0.597243902785811
2-Oxosuccinamate	C02362	Atg7 KO-M	96004.2446038379	85208.4408697432	0.887548683095797	56018.6119006143	193851.670828242	38142.4510826574	0.79233072411661		96004.2446038379	80124.5897160602	1.19818703526659	1.06344932525332
3PG	C00197	WT-M	2809249.06621889	659678.879737881	0.234823920623662	2070582.02626835	3017478.65253561	3339686.51985271	0.0840598988901954		2809249.06621889	1565563.31114797	1.79440144401376	0.421368382256072
3PG	C00197	Atg7 KO-M	1565563.31114797	671844.225643262	0.429138969251025	1640749.06023655	2196651.96833661	859288.904870764	0.0840598988901954		1565563.31114797	1565563.31114797	1	0.429138969251025
4-OH-PheLac	C03672	WT-M	80579.4771559924	38602.0676483765	0.47905582179005	62720.1141405763	124877.251505166	54141.0658222349	0.0449123166834763	*	80579.4771559924	80579.4771559924	1	0.47905582179005
4-OH-PheLac	C03672	Atg7 KO-M	172717.172671821	39694.4185187945	0.229823230109363	217776.657192629	157459.225415715	142915.635407119	0.0449123166834763	*	172717.172671821	80579.4771559924	2.14343873611218	0.492612013874832
5-Oxoproline	C01879	WT-M	76970631.8017712	72934535.5932178	0.947563166443172	30027625.6861705	39888752.5029983	160995517.216145	0.350690659669687		76970631.8017712	32199061.9464708	2.39046193114976	2.26511367674212
5-Oxoproline	C01879	Atg7 KO-M	32199061.9464708	8791120.53184689	0.273024119350484	40665803.612359	32815383.3076555	23115998.9193979	0.350690659669687		32199061.9464708	32199061.9464708	1	0.273024119350484
6P-gluconate	C00345	WT-M	189612.594225735	44604.3879241031	0.235239584724005	235170.042863101	187641.094068967	146026.645745137	0.0570864300641949		189612.594225735	82539.5494985037	2.29723320974962	0.540400186275692
6P-gluconate	C00345	Atg7 KO-M	82539.5494985037	53987.2404735361	0.654077236931306	74829.4673145686	139967.327206078	32821.8539748648	0.0570864300641949		82539.5494985037	82539.5494985037	1	0.654077236931306
A	C00212	WT-M	1847033.50607978	506618.335711682	0.274287571960158	1292946.93332181	2286567.37832844	1961586.20658909	0.0263436823053836	*	1847033.50607978	760961.552276928	2.42723630458482	0.665760752558118
A	C00212	Atg7 KO-M	760961.552276928	206720.451814307	0.271656894091119	974859.264692399	745768.740370823	562256.651767563	0.0263436823053836	*	760961.552276928	760961.552276928	1	0.271656894091119
a-KG	C00026	WT-M	2556529.07038037	2755540.41133902	1.07784434891211	923063.623658506	1008553.36894625	5737970.21853637	0.236394388341477		2556529.07038037	339784.337647061	7.52397561371967	8.10967459660029
a-KG	C00026	Atg7 KO-M	339784.337647061	133314.126490933	0.39234923956209	487472.265517558	228339.000159379	303541.747264245	0.236394388341477		339784.337647061	339784.337647061	1	0.39234923956209
Ac-carnitine	C02571	WT-M	40660618.0882203	4996993.57312302	0.122895170021301	40228474.7618341	45859649.1009293	35893730.4018975	0.000482987223331263	***	40660618.0882203	8032273.9943819	5.06215526470586	0.62211443193025
Ac-carnitine	C02571	Atg7 KO-M	8032273.9943819	2136960.1423515	0.266046719004627	10492985.2388374	6642941.08271795	6960895.66159031	0.000482987223331263	***	8032273.9943819	8032273.9943819	1	0.266046719004627
Ac-choline	C01996	WT-M	9572970.59341436	9912780.42963854	1.03549680142734	3817829.10237313	3881878.919409	21019203.7584609	0.21642182892551		9572970.59341436	1178645.48339325	8.12201016191428	8.41031554382258
Ac-choline	C01996	Atg7 KO-M	1178645.48339325	206003.215727578	0.17477962511213	1403391.40001834	998787.12213781	1133757.92802361	0.21642182892551		1178645.48339325	1178645.48339325	1	0.17477962511213
Acetyl-CoA	C00024	WT-M	17422.2573828816	8710.4874221801	0.499963192527433	18674.4650552566	8153.43562402113	25438.8714693669	0.0718884038438921		17422.2573828816	4748.88470983705	3.66870506390529	1.83421749619165
Acetyl-CoA	C00024	Atg7 KO-M	4748.88470983705	2376.54919350645	0.500443649133777	7442.46813972678	3856.45221271848	2947.73377706587	0.0718884038438921		4748.88470983705	4748.88470983705	1	0.500443649133777
Aconitate	C00417	WT-M	656770.43614716	591228.078269753	0.900205072777178	292080.171267355	339314.2094843	1338916.92768982	0.156147901689578		656770.43614716	61216.1060967827	10.7287195809025	9.6580477911323
Aconitate	C00417	Atg7 KO-M	61216.1060967827	19531.9321747039	0.319065249655441	83528.0095351609	47208.7339956436	52911.5747595436	0.156147901689578		61216.1060967827	61216.1060967827	1	0.319065249655441
ADP	C00008	WT-M	560040.299506526	153940.417020388	0.274873820966154	731231.383946143	432997.665124516	515891.84944892	0.504614573212141		560040.299506526	463718.087558461	1.20771717673385	0.33196983501529
ADP	C00008	Atg7 KO-M	463718.087558461	167970.352161064	0.362225146414821	651934.537453012	329051.69207884	410168.033143531	0.504614573212141		463718.087558461	463718.087558461	1	0.362225146414821
ADP/ATP	NA	WT-M	18.1670139922596	NA	NA	18.1670139922596	NA	NA	0.460392912682726		18.1670139922596	10.9930524741692	1.65259049158069	NA
ADP/ATP	NA	Atg7 KO-M	10.9930524741692	6.85435031857542	0.623516565092486	18.0682005869723	4.38321090399558	10.5277459315397	0.460392912682726		10.9930524741692	10.9930524741692	1	0.623516565092486
Ala	C00041	WT-M	4927342.31661689	1005024.92773553	0.203968968087766	4070549.78718133	4677870.58054296	6033606.58212639	0.0249721452507073	*	4927342.31661689	2458625.54051522	2.00410442152339	0.408775110798255
Ala	C00041	Atg7 KO-M	2458625.54051522	696666.336588998	0.28335601542763	2932707.43559182	2784415.60856399	1658753.57738986	0.0249721452507073	*	2458625.54051522	2458625.54051522	1	0.28335601542763
AMP	C00020	WT-M	11898110.9765594	178752.780338727	0.0150236269178267	11917132.385711	12066592.3953324	11710608.1486347	0.00827914090591772	**	11898110.9765594	4988406.14700755	2.38515281753809	0.0358336460726955
AMP	C00020	Atg7 KO-M	4988406.14700755	2456034.02983208	0.492348449074342	7173644.9069405	2330330.97805876	5461242.5560234	0.00827914090591772	**	4988406.14700755	4988406.14700755	1	0.492348449074342
AMP/ATP	NA	WT-M	296.074150469953	NA	NA	296.074150469953	NA	NA	0.221014998437488		296.074150469953	123.343565705953	2.40040207022866	NA
AMP/ATP	NA	Atg7 KO-M	123.343565705953	85.1437546807681	0.690297497023463	198.815751692945	31.0417250505994	140.173220374313	0.221014998437488		123.343565705953	123.343565705953	1	0.690297497023463
Arg	C00062	WT-M	11164027.2532619	4690380.79798204	0.420133406303858	8548008.27633324	8365090.72743046	16578982.7560221	0.064762792132166		11164027.2532619	4001927.27745766	2.78966269980653	1.17203049250853
Arg	C00062	Atg7 KO-M	4001927.27745766	1438369.48973473	0.359419197304478	4907012.46905657	4755420.49620146	2343348.86711495	0.064762792132166		4001927.27745766	4001927.27745766	1	0.359419197304478
Asn	C00152	WT-M	5427830.27507828	579426.636919728	0.106751060286492	4931938.3751589	5286798.53253125	6064753.91754471	0.012226619190775	*	5427830.27507828	3085249.12175903	1.75928427847138	0.187805462072175
Asn	C00152	Atg7 KO-M	3085249.12175903	732941.439432022	0.237563130401004	3579957.82524984	3432580.08818998	2243209.45183727	0.012226619190775	*	3085249.12175903	3085249.12175903	1	0.237563130401004
Asp	C00049	WT-M	12197116.9403546	1625748.99549063	0.133289612901208	12372384.3116612	13728131.0878495	10490835.4215532	0.0408757954835024	*	12197116.9403546	8229048.4918633	1.48220258422524	0.197562208692553
Asp	C00049	Atg7 KO-M	8229048.4918633	1639595.22975849	0.199244813222292	9977908.68249748	6726614.77979068	7982622.01330175	0.0408757954835024	*	8229048.4918633	8229048.4918633	1	0.199244813222292
ATP	C00002	WT-M	40250.499298217	NA	NA	40250.499298217	NA	NA	0.73407831770135		40250.499298217	40250.499298217	1	NA
ATP	C00002	Atg7 KO-M	50037.8225704687	21727.0335479681	0.434212210520746	36081.874025855	75070.9238697338	38960.6698158172	0.73407831770135		50037.8225704687	40250.499298217	1.24316029472671	0.539795379604907
C	D07769	WT-M	914320.32295983	128045.779620162	0.140044770311627	987091.583733835	989397.598431935	766471.786713719	0.00970245764707818	**	914320.32295983	914320.32295983	1	0.140044770311627
C	D07769	Atg7 KO-M	2111326.70647144	427651.320292076	0.2025509926916	2252484.64288989	2450554.3749668	1630941.10155764	0.00970245764707818	**	2111326.70647144	914320.32295983	2.30917617540937	0.467725926628959
Carnitine	C00318	WT-M	9860640.6637013	934742.619930063	0.0947953233273178	10925160.3454851	9482789.86022291	9173971.78539593	0.54958896163495		9860640.6637013	9860640.6637013	1	0.0947953233273178
Carnitine	C00318	Atg7 KO-M	10634603.1381423	1828971.96198149	0.171983095017589	12632224.2596498	9042268.5013016	10229316.6534756	0.54958896163495		10634603.1381423	9860640.6637013	1.07849007998944	0.185482061902351
CDP-choline	C00307	WT-M	85355.4254540751	27498.5923547652	0.322165723016173	65910.9843269361	104799.866581214	NA	0.560046979125649		85355.4254540751	72840.9472569856	1.17180553889474	0.37751557867238
CDP-choline	C00307	Atg7 KO-M	72840.9472569856	16792.3891398861	0.230535018725689	92210.5070138443	62381.9263666791	63930.4083904334	0.560046979125649		72840.9472569856	72840.9472569856	1	0.230535018725689
CDP-EtA	C00570	WT-M	293505.378855229	36801.5701827693	0.12538635689168	267482.73902068	319528.018689777	NA	0.0631832237062467		293505.378855229	181473.42426667	1.61734634170968	0.202793165619063
CDP-EtA	C00570	Atg7 KO-M	181473.42426667	45099.7488653473	0.248519853789029	228533.052168332	138629.602082559	177257.61854912	0.0631832237062467		181473.42426667	181473.42426667	1	0.248519853789029
Choline	C00114	WT-M	13129534.2145669	1833332.31903513	0.13963422380979	13434680.4603237	11162774.8502723	14791147.3331048	0.154989660298875		13129534.2145669	9809296.8771205	1.33847862686169	0.186897424147825
Choline	C00114	Atg7 KO-M	9809296.8771205	2726917.62125021	0.277993178859797	11749679.1051618	10986724.7516336	6691486.77456604	0.154989660298875		9809296.8771205	9809296.8771205	1	0.277993178859797
Cit	C00158	WT-M	40162676.9635263	27289220.7635663	0.679467177657233	25919402.5751553	22941996.6652082	71626631.6502153	0.0830941112640445		40162676.9635263	3891186.71251966	10.3214468825937	7.01308438265501
Cit	C00158	Atg7 KO-M	3891186.71251966	1581165.12425912	0.406345220899272	4688177.77574035	4915254.74153961	2070127.62027904	0.0830941112640445		3891186.71251966	3891186.71251966	1	0.406345220899272
Citrulline	C00327	WT-M	428046.695675345	191107.18313278	0.446463400053266	310002.282542083	648534.356259124	325603.448224827	0.0482589369968514	*	428046.695675345	115634.695108396	3.70171508883293	1.65268030458883
Citrulline	C00327	Atg7 KO-M	115634.695108396	22999.7002716328	0.198899649020329	136113.046667278	120040.110503108	90750.9281548023	0.0482589369968514	*	115634.695108396	115634.695108396	1	0.198899649020329
CMP	C00055	WT-M	369047.18527908	116873.473927366	0.316689785451104	471148.074314165	394422.948645578	241570.532877497	0.126422384092524		369047.18527908	219931.59576757	1.67800894633211	0.531408293198949
CMP	C00055	Atg7 KO-M	219931.59576757	65777.7958917911	0.299082974695945	256662.693682956	259140.678956596	143991.41466316	0.126422384092524		219931.59576757	219931.59576757	1	0.299082974695945
Creatine	C00300	WT-M	49113703.1064299	2114222.65738339	0.0430475106469135	51553643.3813277	47964132.0896586	47823333.8483035	0.365096038970267		49113703.1064299	49113703.1064299	1	0.0430475106469135
Creatine	C00300	Atg7 KO-M	60519832.4775939	19239086.6857971	0.317897223078402	81404162.4644724	43518244.7006322	56637090.267677	0.365096038970267		60519832.4775939	49113703.1064299	1.23223924586681	0.391725434429284
Creatine/P-Creatine	NA	WT-M	65.0295272961613	24.6265842888414	0.378698497633015	71.6348127656639	85.6798865994677	37.7738825233523	0.0186618986029312	*	65.0295272961613	65.0295272961613	1	0.378698497633015
Creatine/P-Creatine	NA	Atg7 KO-M	788.814604011468	326.626835185703	0.414073007173882	605.190648217572	595.325387365912	1165.92777645092	0.0186618986029312	*	788.814604011468	65.0295272961613	12.1300989997821	5.02274657015666
Creatinine	C00791	WT-M	2183391.87822284	1382299.35532811	0.633097232391113	1350104.42263912	1421063.37563112	3779007.83639827	0.286712171575725		2183391.87822284	1189735.17877546	1.83519149233707	1.16185465470631
Creatinine	C00791	Atg7 KO-M	1189735.17877546	230217.744354713	0.193503351385866	1421288.16356468	960876.321521543	1187041.05124014	0.286712171575725		1189735.17877546	1189735.17877546	1	0.193503351385866
Cystathionine	C02291	WT-M	0	0	NA	0	0	0	0.0549271916193931		NA	3357.00625138535	0	0
Cystathionine	C02291	Atg7 KO-M	3357.00625138535	2080.49134738204	0.619746045013613	NA	4828.13579131913	1885.87671145157	0.0549271916193931		3357.00625138535	3357.00625138535	1	0.619746045013613
Cystine	C00491	WT-M	57053.689182704	22008.5132339412	0.385750922494476	38801.4265445938	50865.910608768	81493.7303947502	0.055216109005409		57053.689182704	16547.7990181984	3.44781134457576	1.32999640675702
Cystine	C00491	Atg7 KO-M	16547.7990181984	14171.2980888297	0.856385678436439	16316.5856789218	30833.2890612548	2493.52231441851	0.055216109005409		16547.7990181984	16547.7990181984	1	0.856385678436439
Cytosine	C00380	WT-M	660633.939734698	202959.586059499	0.307219435533399	487300.998712497	610701.134109763	883899.686381834	0.652977232226334		660633.939734698	559404.772394233	1.18095871243144	0.362813469021437
Cytosine	C00380	Atg7 KO-M	559404.772394233	299077.316514067	0.534634903513651	463808.563307967	894593.316687032	319812.437187699	0.652977232226334		559404.772394233	559404.772394233	1	0.534634903513651
dA	C00559	WT-M	66112.5657809367	33801.5726998703	0.51127304318927	55791.4408147764	38674.7831900825	103871.473337951	0.0490137805910337	*	66112.5657809367	10996.1802755196	6.01232101733736	3.07393766316488
dA	C00559	Atg7 KO-M	10996.1802755196	4822.58556766526	0.438569161911762	14185.385532227	13354.9381076343	5448.21718669737	0.0490137805910337	*	10996.1802755196	10996.1802755196	1	0.438569161911762
dC	C00881	WT-M	260937.111247265	122383.563687682	0.469015553604833	174914.978651902	206850.9006073	401045.454482595	0.276920161322629		260937.111247265	161594.623762628	1.61476356806626	0.757349228817512
dC	C00881	Atg7 KO-M	161594.623762628	61151.3103799361	0.378424163849432	171627.853671954	217108.85618658	96047.1614293494	0.276920161322629		161594.623762628	161594.623762628	1	0.378424163849432
dGDP	C00361	WT-M	66074.074217252	25124.7325269819	0.380250995940883	83839.9429625792	48308.2054719249	NA	0.0519320166580604		66074.074217252	16453.5496379661	4.01579450459661	1.52700985986679
dGDP	C00361	Atg7 KO-M	16453.5496379661	11653.3995256068	0.708260514115259	29909.2326029156	9826.54199649365	9624.87431448922	0.0519320166580604		16453.5496379661	16453.5496379661	1	0.708260514115259
DHAP	C00111	WT-M	135042.635787663	65108.9565736889	0.482136298613604	59861.340958591	172710.140099156	172556.426305242	0.0360790562212731	*	135042.635787663	16384.2824143544	8.24220630311833	3.97386683939519
DHAP	C00111	Atg7 KO-M	16384.2824143544	12029.5710303388	0.734214091658937	17965.9851471532	27544.7590713489	3642.10302456127	0.0360790562212731	*	16384.2824143544	16384.2824143544	1	0.734214091658937
DMG	C01026	WT-M	29916.5699882772	17903.4078566495	0.598444536377833	34510.6990112727	10163.7758509061	45075.2351026528	0.107069465210558		29916.5699882772	7885.34266100121	3.79394672805235	2.27046669071149
DMG	C01026	Atg7 KO-M	7885.34266100121	4342.89912053864	0.550755916038684	12633.629779041	4114.38134197524	6908.01686198739	0.107069465210558		7885.34266100121	7885.34266100121	1	0.550755916038684
dT	C00214	WT-M	269463.426212376	185776.032248779	0.68942948904079	200706.419458119	127867.244834152	479816.614344856	0.560219740488023		269463.426212376	269463.426212376	1	0.68942948904079
dT	C00214	Atg7 KO-M	351594.219948711	125498.344682932	0.356940864105329	361357.38516549	471925.835414121	221499.439266523	0.560219740488023		351594.219948711	269463.426212376	1.30479384490422	0.465734242479428
dU	C00526	WT-M	15613.1335800942	2300.65586523398	0.147353883410514	17239.9429435777	13986.3242166106	NA	0.086129834238663		15613.1335800942	15613.1335800942	1	0.147353883410514
dU	C00526	Atg7 KO-M	46414.9085268775	16313.8283055082	0.351478195762495	63486.7516273952	44775.0092971365	30982.9646561009	0.086129834238663		46414.9085268775	15613.1335800942	2.97281185027801	1.04487854547708
F16BP	C00354	WT-M	503114.652624462	65973.9299567433	0.131131004856636	465981.740503846	464075.383604539	579286.833765002	0.000412730532002913	***	503114.652624462	61266.661822164	8.21188290109278	1.07683245658533
F16BP	C00354	Atg7 KO-M	61266.661822164	25355.2605156912	0.413850857245801	88440.4510864582	57117.8876905913	38241.6466894425	0.000412730532002913	***	61266.661822164	61266.661822164	1	0.413850857245801
Folate	C00504	WT-M	39256.2222513444	22587.5710503161	0.575388301647965	25579.1726178543	26861.9079395217	65327.5861966571	0.126396963041601		39256.2222513444	13583.6098715276	2.88996979614593	1.66285481281832
Folate	C00504	Atg7 KO-M	13583.6098715276	4778.40162512785	0.351777007019598	15374.0716970753	17208.2027307018	8168.55518680568	0.126396963041601		13583.6098715276	13583.6098715276	1	0.351777007019598
Fru	C00095	WT-M	308724.938619168	325389.429971074	1.05397844251404	93299.5720665619	149843.895935619	683031.347855324	0.430426917024774		308724.938619168	137033.213524134	2.2529205196286	2.37452966038608
Fru	C00095	Atg7 KO-M	137033.213524134	96604.7803704788	0.704973472387154	248133.308884203	90146.894756415	72819.4369317831	0.430426917024774		137033.213524134	137033.213524134	1	0.704973472387154
G	C00387	WT-M	9043.60410685388	3886.83489100011	0.429788261966752	11792.0114156325	6295.19679807522	NA	0.0141948615699361	*	9043.60410685388	9043.60410685388	1	0.429788261966752
G	C00387	Atg7 KO-M	21159.9721912977	1552.80889306204	0.0733842596305801	22778.9492986156	19683.1004622005	21017.866813077	0.0141948615699361	*	21159.9721912977	9043.60410685388	2.33977205783048	0.171702440168209
G6P-F6P	C00085	WT-M	1797926.45878336	457691.693382992	0.254566415187364	1454702.14021532	1621502.00138831	2317575.23474646	0.050393769675204		1797926.45878336	851699.297210969	2.11098736921702	0.537386487087379
G6P-F6P	C00085	Atg7 KO-M	851699.297210969	375358.64236223	0.440717332503859	796715.412120656	1251517.29267386	506865.186838393	0.050393769675204		851699.297210969	851699.297210969	1	0.440717332503859
GABA	C00334	WT-M	236827.003642132	66771.2405207287	0.28194099276629	175503.851690586	227016.344237059	307960.814998752	0.21661977021003		236827.003642132	149522.98880663	1.58388355885801	0.446561703010633
GABA	C00334	Atg7 KO-M	149522.98880663	78653.0639621656	0.526026563473013	231980.379572751	141262.28550178	75326.3013453599	0.21661977021003		149522.98880663	149522.98880663	1	0.526026563473013
GDP	C00035	WT-M	321615.664332176	252033.207809575	0.783647178171229	227463.338153342	130212.808543369	607170.846299817	0.163011579610671		321615.664332176	69595.4769427577	4.62121503379745	3.62140212095783
GDP	C00035	Atg7 KO-M	69595.4769427577	43254.1386754894	0.621507899300208	119227.560282387	39940.7639589863	49618.1065868994	0.163011579610671		69595.4769427577	69595.4769427577	1	0.621507899300208
Glc	C00031	WT-M	26332872.080149	28309636.0250968	1.0750683001433	9504558.91854624	10476853.5693955	59017203.7525051	0.206141275797235		26332872.080149	1684554.10394078	15.6319538912682	16.8054180978042
Glc	C00031	Atg7 KO-M	1684554.10394078	687853.850909954	0.408329924993692	2412483.72604749	1595783.35015672	1045395.23561813	0.206141275797235		1684554.10394078	1684554.10394078	1	0.408329924993692
GlcA	C00257	WT-M	10439705.9613122	5635929.87333035	0.539855231001348	7545634.23895738	6838775.18368375	16934708.4612955	0.369916005214437		10439705.9613122	6997291.37983986	1.49196387496316	0.805444502363904
GlcA	C00257	Atg7 KO-M	6997291.37983986	1770046.6701085	0.252961692464064	9036440.81782342	6097997.13116931	5857436.19052686	0.369916005214437		6997291.37983986	6997291.37983986	1	0.252961692464064
GlcN	C00329	WT-M	5177767.77043532	6131262.64463621	1.1841517264728	3575590.01528547	6658.4389595283	11951054.857061	0.256436465650833		5177767.77043532	469148.09468083	11.036531596612	13.0689279443998
GlcN	C00329	Atg7 KO-M	469148.09468083	644594.474804125	1.37396801162041	197540.111854772	1205096.95585188	4807.21633583487	0.256436465650833		469148.09468083	469148.09468083	1	1.37396801162041
GlcNAc	C00140	WT-M	40438.2074024946	12133.8644712018	0.300059405463488	38374.3224075248	53471.6477669604	29468.6520329986	0.0165524467583819	*	40438.2074024946	40438.2074024946	1	0.300059405463488
GlcNAc	C00140	Atg7 KO-M	115997.378341628	30659.8494825566	0.264315020915897	108558.723755386	149692.131966212	89741.2793032854	0.0165524467583819	*	115997.378341628	40438.2074024946	2.86850940713242	0.758190123943655
GlcNAc-6P	C00357	WT-M	396337.94672341	35867.4271519046	0.0904970807070744	414808.844626194	354999.666456137	419205.329087899	0.0515171549289724		396337.94672341	241596.574231141	1.64049489519758	0.148459998930239
GlcNAc-6P	C00357	Atg7 KO-M	241596.574231141	90724.8663194705	0.375522155511492	321440.359402219	260409.074005206	142940.289285999	0.0515171549289724		241596.574231141	241596.574231141	1	0.375522155511492
Gln	C00064	WT-M	7722685.91824241	4182539.63359005	0.541591316527598	5878823.96744046	4778899.93344826	12510333.8538385	0.0522561817804657		7722685.91824241	1106150.14737707	6.98158919614543	3.78116808419526
Gln	C00064	Atg7 KO-M	1106150.14737707	289548.216819052	0.261762128320135	1263676.99642431	1282782.76576529	771990.679941603	0.0522561817804657		1106150.14737707	1106150.14737707	1	0.261762128320135
Glu	C00025	WT-M	15820341.7941997	1586843.43339938	0.100303991787407	15605998.2926123	14351564.7102852	17503462.3797017	0.000496705364602607	***	15820341.7941997	4647048.8940622	3.40438462233834	0.341473367200198
Glu	C00025	Atg7 KO-M	4647048.8940622	997960.999060926	0.214751559927867	5773730.17328321	4293155.44812198	3874261.06078141	0.000496705364602607	***	4647048.8940622	4647048.8940622	1	0.214751559927867
GlucA	C00191	WT-M	224714.253436655	23349.9556598711	0.103909544244612	238909.55784277	237468.31221606	197764.890251134	0.783157415789465		224714.253436655	212845.788611014	1.0557608628439	0.109703630089409
GlucA	C00191	Atg7 KO-M	212845.788611014	65827.1459326566	0.309271545198195	283868.158063629	200788.39717367	153880.810595742	0.783157415789465		212845.788611014	212845.788611014	1	0.309271545198195
Gly	C00037	WT-M	1420888.35487473	588247.002373245	0.413999453479302	982700.713547133	1190506.67115379	2089457.67992328	0.0898083341084289		1420888.35487473	644817.161381833	2.2035523245532	0.912269458078072
Gly	C00037	Atg7 KO-M	644817.161381833	133989.606383207	0.207794727572184	736984.963784725	706353.131806832	491113.38855394	0.0898083341084289		644817.161381833	644817.161381833	1	0.207794727572184
Glycerol	C00116	WT-M	2237262.71165624	1294795.52948955	0.578740942109126	1686891.8692402	1308573.38229848	3716322.88343004	0.183497324280883		2237262.71165624	1011811.63631886	2.21114546556884	1.27968040988363
Glycerol	C00116	Atg7 KO-M	1011811.63631886	264037.159028715	0.260954855183644	1315659.20968186	881638.952345535	838136.746929203	0.183497324280883		1011811.63631886	1011811.63631886	1	0.260954855183644
Glycerol-3P	C00093	WT-M	1283804.56338249	105238.60813605	0.0819740100150244	1391738.94476226	1181486.65781126	1278188.08757395	0.0497355225201203	*	1283804.56338249	1283804.56338249	1	0.0819740100150244
Glycerol-3P	C00093	Atg7 KO-M	1788110.0527312	295858.576024166	0.165458818137208	1653928.66966169	2127283.1110875	1583118.37744442	0.0497355225201203	*	1788110.0527312	1283804.56338249	1.39282107552258	0.230454529032562
GMP	C00144	WT-M	1960308.36460021	443706.23459879	0.226345121314259	2194079.31588989	2238250.16685251	1448595.61105821	0.203944949013234		1960308.36460021	1476021.61091272	1.32810275276934	0.300609578693376
GMP	C00144	Atg7 KO-M	1476021.61091272	330154.013066642	0.223678305673646	1841679.19684606	1199798.11932211	1386587.51656998	0.203944949013234		1476021.61091272	1476021.61091272	1	0.223678305673646
GSH	C00051	WT-M	331609.337220247	41875.9296679037	0.126280912410167	352384.022925074	283407.938635204	359036.050100465	0.849043386635365		331609.337220247	311382.043934526	1.06495972930916	0.134484086297246
GSH	C00051	Atg7 KO-M	311382.043934526	167427.609760359	0.537691922259858	504710.736224443	214848.323859109	214587.071720027	0.849043386635365		311382.043934526	311382.043934526	1	0.537691922259858
GSH/GSSG	NA	WT-M	1.70519457970605	0.642129076953768	0.376572318840271	1.58672201089156	1.13055158593931	2.39831014228728	0.0477915350842333	*	1.70519457970605	0.651215479383942	2.61847980229092	0.986047010985105
GSH/GSSG	NA	Atg7 KO-M	0.651215479383942	0.0807271933517313	0.123963873567779	0.732890527333219	0.571470762587021	0.649285148231585	0.0477915350842333	*	0.651215479383942	0.651215479383942	1	0.123963873567779
GSSG	C00127	WT-M	207489.302267326	52046.5109419602	0.250839490871217	222083.024314432	250681.120755526	149703.761732021	0.0915902354895658		207489.302267326	207489.302267326	1	0.250839490871217
GSSG	C00127	Atg7 KO-M	465037.326396084	194990.273492861	0.41930026349494	688657.742734024	375956.808160229	330497.428294	0.0915902354895658		465037.326396084	207489.302267326	2.24125929054856	0.939760611087495
His	C00135	WT-M	3950785.18082031	1318751.07960894	0.333794681120862	3143743.22486269	3235996.3309952	5472615.98660304	0.0541971738142051		3950785.18082031	1765138.95055021	2.23822899584693	0.747108933944195
His	C00135	Atg7 KO-M	1765138.95055021	478990.679570702	0.271361458213471	2008671.49536995	2073431.9715242	1213313.38475649	0.0541971738142051		1765138.95055021	1765138.95055021	1	0.271361458213471
HS2O3	C00320	WT-M	6478137.77527529	10016566.7531047	1.54621082486611	896631.098686628	495824.549716338	18041957.6774229	0.360920092257814		6478137.77527529	514685.927962798	12.5865842124666	19.4615127574048
HS2O3	C00320	Atg7 KO-M	514685.927962798	307908.787557045	0.598245980370579	774608.508297424	594815.119800244	174634.155790726	0.360920092257814		514685.927962798	514685.927962798	1	0.598245980370579
Hypoxanthine	C00262	WT-M	879121.016547358	104859.950491422	0.119278175038115	759157.489517591	953321.547730264	924884.012394219	0.207376858416994		879121.016547358	879121.016547358	1	0.119278175038115
Hypoxanthine	C00262	Atg7 KO-M	1215525.14500778	373343.140399718	0.307145550985149	1130466.67277895	1624058.33289061	892050.429353783	0.207376858416994		1215525.14500778	879121.016547358	1.38265963630537	0.424677755817939
Ile	C00407	WT-M	25081996.7797355	11073642.9098142	0.441497660934276	17184641.9449885	20321517.6791301	37739830.7150878	0.0834393499940944		25081996.7797355	9926920.60416818	2.52666438867295	1.11551641756504
Ile	C00407	Atg7 KO-M	9926920.60416818	2871735.54504698	0.289287651181694	11143670.1201064	11989969.7178983	6647121.97449988	0.0834393499940944		9926920.60416818	9926920.60416818	1	0.289287651181694
IMP	C00130	WT-M	1332898.03748469	1030153.40572145	0.772867373760601	2254874.46569326	1522821.21419356	220998.432567242	0.918950759964101		1332898.03748469	1332898.03748469	1	0.772867373760601
IMP	C00130	Atg7 KO-M	1428802.24702514	1135803.24255193	0.794933830008134	2693649.03273127	1096663.65616533	496094.052178832	0.918950759964101		1428802.24702514	1332898.03748469	1.07195164734539	0.852130628607798
Inosine	C00294	WT-M	87675.8552866598	56752.8836116576	0.647303450033098	47545.5064329659	127806.204140354	NA	0.610882208970111		87675.8552866598	87675.8552866598	1	0.647303450033098
Inosine	C00294	Atg7 KO-M	105613.460732289	14019.1829251652	0.132740493758663	118309.342624003	107963.130213037	90567.9093598275	0.610882208970111		105613.460732289	87675.8552866598	1.20459002523536	0.159897874726501
Inositol	C00137	WT-M	10767422.0370169	4777551.79125284	0.443704330974329	8099229.67420805	7919943.96290594	16283092.4739368	0.0640881641504731		10767422.0370169	3536702.98988718	3.04448014656735	1.35084902659729
Inositol	C00137	Atg7 KO-M	3536702.98988718	1231662.42209478	0.348251585054381	4796904.28165398	3477489.24188493	2335715.44612264	0.0640881641504731		3536702.98988718	3536702.98988718	1	0.348251585054381
Lac	C00186	WT-M	15845336.9009339	8636059.6087003	0.545022151481759	9732813.98280537	12078159.1064736	25725037.6135227	0.833117754674621		15845336.9009339	14615341.8242609	1.084157804276	0.590890019032246
Lac	C00186	Atg7 KO-M	14615341.8242609	3897852.82177711	0.266695973905094	18852553.4060695	13811188.4396749	11182283.6270383	0.833117754674621		14615341.8242609	14615341.8242609	1	0.266695973905094
Leu	C00123	WT-M	50500155.8575662	20064363.7085149	0.397312906619648	34990901.0085566	43349215.4784306	73160351.0857115	0.0701574739408259		50500155.8575662	20764058.7638647	2.43209463197295	0.966302587403216
Leu	C00123	Atg7 KO-M	20764058.7638647	6163275.00159211	0.296824193751461	23353983.6802054	25209756.1493917	13728436.4619971	0.0701574739408259		20764058.7638647	20764058.7638647	1	0.296824193751461
Lys	C00047	WT-M	4330839.08416744	1244121.41946573	0.287270294575006	3460871.898277	3775769.17957891	5755876.17464641	0.0405587577315579	*	4330839.08416744	1965554.41548204	2.20336768601002	0.632962084217146
Lys	C00047	Atg7 KO-M	1965554.41548204	580055.778041883	0.295110516133753	2183176.85889796	2405327.79046911	1308158.59707906	0.0405587577315579	*	1965554.41548204	1965554.41548204	1	0.295110516133753
Mal	C00149	WT-M	51416136.9820587	9706425.74636364	0.188781699989453	46842042.80937	44841866.5792142	62564501.5575918	0.0133908841959761	*	51416136.9820587	20849754.5041874	2.46603080970245	0.465541488481998
Mal	C00149	Atg7 KO-M	20849754.5041874	7910674.97580134	0.379413339097714	29156649.8578894	19986503.7454178	13406109.909255	0.0133908841959761	*	20849754.5041874	20849754.5041874	1	0.379413339097714
Met	C00073	WT-M	5804750.7987534	622296.803778445	0.107204740625917	5159193.72472445	5854224.81673963	6400833.85479611	0.0218521047468751	*	5804750.7987534	3058811.04914429	1.89771473474221	0.203444015920021
Met	C00073	Atg7 KO-M	3058811.04914429	1146546.94962445	0.374834185964249	3066125.42403961	4201683.31296818	1908624.41042507	0.0218521047468751	*	3058811.04914429	3058811.04914429	1	0.374834185964249
MTA	C00170	WT-M	356563.989962168	89761.6140900844	0.2517405476072	278084.165557228	454436.957987139	337170.846342136	0.113905025627006		356563.989962168	236088.889139415	1.51029551310909	0.38020261951878
MTA	C00170	Atg7 KO-M	236088.889139415	51452.302220796	0.217936144341009	289307.325570734	232352.97242735	186606.369420161	0.113905025627006		236088.889139415	236088.889139415	1	0.217936144341009
NAD+	C00003	WT-M	72570.0428167104	NA	NA	72570.0428167104	NA	NA	0.496112187562247		72570.0428167104	72570.0428167104	1	NA
NAD+	C00003	Atg7 KO-M	245877.170975145	181926.461856121	0.739907902529556	440988.814522784	80898.6346490995	215744.063753553	0.496112187562247		245877.170975145	72570.0428167104	3.38813595020407	2.50690856440048
NADP+	C00006	WT-M	28178.9856595588	7423.78721774738	0.263451186903497	36643.6519362749	22774.1827892853	25119.1222531161	0.137237528638662		28178.9856595588	28178.9856595588	1	0.263451186903497
NADP+	C00006	Atg7 KO-M	74252.9326798977	42381.4591611228	0.570771518800853	122684.972953149	43958.986346491	56114.8387400529	0.137237528638662		74252.9326798977	28178.9856595588	2.63504632767751	1.50400939455911
NAM	C00153	WT-M	35715593.7456729	4471355.63578366	0.125193372609839	31638748.0832065	35010384.2573386	40497648.8964737	0.0616606940157254		35715593.7456729	24021203.1481607	1.48683617241744	0.186142034943243
NAM	C00153	Atg7 KO-M	24021203.1481607	6472191.95165665	0.269436626955641	25200375.9053819	29822738.1395102	17040495.3995901	0.0616606940157254		24021203.1481607	24021203.1481607	1	0.269436626955641
Ornithine	C00077	WT-M	243918.48265551	77617.5854525402	0.318211168778714	170940.941560896	325464.976661957	235349.529743676	0.41632144324102		243918.48265551	184371.017696095	1.32297627741888	0.420985827503973
Ornithine	C00077	Atg7 KO-M	184371.017696095	83330.555643195	0.451972097808516	138939.213349225	280544.01530043	133629.824438629	0.41632144324102		184371.017696095	184371.017696095	1	0.451972097808516
Orotidine	HMDB0000788	WT-M	564966.809119487	11468.5441941079	0.0202995008007318	573879.88604105	568992.328237792	552028.213079619	0.0762791939614692		564966.809119487	418633.045186935	1.3495513925978	0.0273952195746678
Orotidine	HMDB0000788	Atg7 KO-M	418633.045186935	106033.183326579	0.253284313184668	532697.350325479	400137.066354991	323064.718880333	0.0762791939614692		418633.045186935	418633.045186935	1	0.253284313184668
P-Choline	C00588	WT-M	719099.783041616	175776.548348072	0.244439718232955	608465.050102272	627049.032709375	921785.2663132	0.0379089423419789	*	719099.783041616	379118.454153651	1.8967680817515	0.4636454554566
P-Choline	C00588	Atg7 KO-M	379118.454153651	79374.9192888427	0.209367068311249	457761.987714312	380561.547043511	299031.827703132	0.0379089423419789	*	379118.454153651	379118.454153651	1	0.209367068311249
P-Creatine	C02305	WT-M	848507.187475758	370325.587944303	0.436443666489134	719673.038721733	559806.204154763	1266042.31955078	0.0239288677534714	*	848507.187475758	85395.5738122771	9.93619633426212	4.33658995908125
P-Creatine	C02305	Atg7 KO-M	85395.5738122771	44266.3727691083	0.51836846797725	134509.947739984	73099.9309355576	48576.8427612902	0.0239288677534714	*	85395.5738122771	85395.5738122771	1	0.51836846797725
P-EtA	C00346	WT-M	1123159.07922935	65524.3182275444	0.0583393033447262	1197779.7435657	1096677.1181153	1075020.37600705	0.0843837485161981		1123159.07922935	886794.665430893	1.26653792925514	0.0738889404524171
P-EtA	C00346	Atg7 KO-M	886794.665430893	166812.19801643	0.188106902893215	1079382.04822591	793481.64479626	787520.303270508	0.0843837485161981		886794.665430893	886794.665430893	1	0.188106902893215
Palmitate	C00249	WT-M	82210404.1182632	81828425.8205519	0.995353650163769	26055534.9575051	44478536.3590553	176097141.038229	0.203890110664877		82210404.1182632	10500876.789875	7.82890855338205	7.79253270540718
Palmitate	C00249	Atg7 KO-M	10500876.789875	2929938.73165286	0.279018484863848	13403004.4925277	10555728.6298677	7543897.24722947	0.203890110664877		10500876.789875	10500876.789875	1	0.279018484863848
Pantothenate	C00864	WT-M	18826536.0597343	11036687.236074	0.586230371909943	12644400.8595276	12266470.6475072	31568736.6721679	0.0915695810722083		18826536.0597343	4618452.66439939	4.07637306859408	2.38969370004558
Pantothenate	C00864	Atg7 KO-M	4618452.66439939	1457861.19289619	0.31566009199009	6122350.32547905	4521544.38718589	3211463.28053325	0.0915695810722083		4618452.66439939	4618452.66439939	1	0.31566009199009
PEP	C00074	WT-M	643760.09346542	184602.657089019	0.286756912960052	530162.054359533	544354.903287003	856763.322749724	0.074040097337973		643760.09346542	279674.215022197	2.30182140106955	0.660063199156086
PEP	C00074	Atg7 KO-M	279674.215022197	186379.092633914	0.666415002252252	264128.54130375	473339.26579185	101554.837970991	0.074040097337973		279674.215022197	279674.215022197	1	0.666415002252252
Phe	C00079	WT-M	24699625.1119191	10723503.3262734	0.434156521715733	17061081.3172785	20078931.9553062	36958862.0631726	0.0995818035911406		24699625.1119191	10837989.0928389	2.27898597242906	0.989436622828746
Phe	C00079	Atg7 KO-M	10837989.0928389	3376216.55931433	0.311516881073918	12342180.2512148	13200680.0191255	6971107.00817649	0.0995818035911406		10837989.0928389	10837989.0928389	1	0.311516881073918
PO4	C00009	WT-M	78864184.48664	89744534.7005549	1.13796313605142	23753530.9625545	30418238.8268985	182420783.670467	0.257514999033223		78864184.48664	10478681.3907121	7.52615539551975	8.564487396296
PO4	C00009	Atg7 KO-M	10478681.3907121	2497463.27374308	0.238337552276066	12563359.3105345	11162004.9938905	7710679.86771122	0.257514999033223		10478681.3907121	10478681.3907121	1	0.238337552276066
Pro	C00148	WT-M	13691430.6068058	2475162.51509429	0.180781876355852	11438185.1673147	13295360.5741593	16340746.0789435	0.0976146762537583		13691430.6068058	9092668.01256703	1.50576602905581	0.272215208085609
Pro	C00148	Atg7 KO-M	9092668.01256703	2748891.89443846	0.302319615171169	10573548.1800678	10783616.851724	5920839.00590928	0.0976146762537583		9092668.01256703	9092668.01256703	1	0.302319615171169
Pro-OH	C01157	WT-M	1991434.5753056	335566.096755332	0.168504705560732	1766300.7137707	1830888.592456	2377114.41969011	0.213875644261628		1991434.5753056	1471910.35341948	1.35295914637681	0.227979982595923
Pro-OH	C01157	Atg7 KO-M	1471910.35341948	508775.195855575	0.34565637416274	1580990.64820757	1917298.51777081	917441.894280053	0.213875644261628		1471910.35341948	1471910.35341948	1	0.34565637416274
R5P	C00117	WT-M	1176731.12883202	314286.793117406	0.267084625720199	947685.021668384	1047472.31491152	1535036.04991614	0.066108916203697		1176731.12883202	672288.748300097	1.75033589630559	0.467487807749408
R5P	C00117	Atg7 KO-M	672288.748300097	149883.080267307	0.222944502115037	741334.46410562	775204.802635074	500326.978159595	0.066108916203697		672288.748300097	672288.748300097	1	0.222944502115037
Rib	C00121	WT-M	130149.529709492	27629.8601702654	0.212293200228524	110612.268219861	149686.791199122	NA	0.0233919757634245	*	130149.529709492	31547.0621787605	4.12556734988516	0.875829895465433
Rib	C00121	Atg7 KO-M	31547.0621787605	23927.030766509	0.758455117973496	26933.620610617	57444.8812622855	10262.6846633791	0.0233919757634245	*	31547.0621787605	31547.0621787605	1	0.758455117973496
S7P	C05382	WT-M	131947.351702843	55999.8846323581	0.424410826815796	173796.291062424	153713.475655561	68332.2883905435	0.532508277074926		131947.351702843	131947.351702843	1	0.424410826815796
S7P	C05382	Atg7 KO-M	159221.543941703	40714.1195650972	0.255707353145654	181107.545612909	184311.746267864	112245.339944335	0.532508277074926		159221.543941703	131947.351702843	1.20670511296266	0.308563370463009
SAM	C00019	WT-M	218116.119710866	86956.3555735565	0.398670009758222	244834.236874418	288578.385600019	120935.736658161	0.411642740516519		218116.119710866	169061.302693573	1.29015993746485	0.51434807485878
SAM	C00019	Atg7 KO-M	169061.302693573	32379.695410812	0.191526356977746	205661.96020904	157374.488657493	144147.459214184	0.411642740516519		169061.302693573	169061.302693573	1	0.191526356977746
Ser	C00065	WT-M	9020308.058592	2115003.47616785	0.23447131322231	7368862.76957742	8287895.26378545	11404166.1424131	0.0193252817956334	*	9020308.058592	3907542.54859482	2.3084350193028	0.541261790464296
Ser	C00065	Atg7 KO-M	3907542.54859482	998029.607408168	0.255411065905621	4392738.14981205	4570208.2558572	2759681.24011521	0.0193252817956334	*	3907542.54859482	3907542.54859482	1	0.255411065905621
Sorbitol	C00794	WT-M	3322492.00283771	3062258.28101539	0.921675139744487	1799648.21734655	1320196.13079787	6847631.66036871	0.448231074199533		3322492.00283771	1824615.15608315	1.82092754834395	1.67830365258449
Sorbitol	C00794	Atg7 KO-M	1824615.15608315	404952.430569945	0.221938543708715	2287166.95700009	1534002.55007172	1652675.96117765	0.448231074199533		1824615.15608315	1824615.15608315	1	0.221938543708715
Succ	C00042	WT-M	7255327.91577949	7183428.06426154	0.990090061765288	3242346.07795787	2975037.35833806	15548600.3110425	0.240081681733357		7255327.91577949	1533940.39880785	4.72986298647471	4.68299033642009
Succ	C00042	Atg7 KO-M	1533940.39880785	255126.685849378	0.16632112046052	1827846.33721463	1369548.95606439	1404425.90314452	0.240081681733357		1533940.39880785	1533940.39880785	1	0.16632112046052
Thr	C00188	WT-M	4874879.07057146	1458926.76825579	0.29927445319885	3863185.16515355	4214182.45511055	6547269.59145027	0.0375199048399731	*	4874879.07057146	2114920.0852764	2.30499445558689	0.689825955322148
Thr	C00188	Atg7 KO-M	2114920.0852764	553212.937257251	0.261576284186148	2551876.77638214	2299983.79641927	1492899.68302778	0.0375199048399731	*	2114920.0852764	2114920.0852764	1	0.261576284186148
Thymine	C00178	WT-M	199587.090855637	116089.412255049	0.581647899958706	129802.853104081	135361.240831733	333597.178631098	0.681184866900163		199587.090855637	199587.090855637	1	0.581647899958706
Thymine	C00178	Atg7 KO-M	236821.841381527	88269.2772416082	0.372724393690546	242547.446593931	322088.933751262	145829.143799388	0.681184866900163		236821.841381527	199587.090855637	1.18655891203315	0.442259451065671
Trp	C00078	WT-M	5046219.44390935	528336.467583565	0.104699463322241	4491485.30798616	5103718.47915623	5543454.54458567	0.0149203931282631	*	5046219.44390935	2741177.15699755	1.84089504431612	0.192740723172471
Trp	C00078	Atg7 KO-M	2741177.15699755	819541.360171934	0.298974241077359	2873260.29155588	3486654.89029379	1863616.28914297	0.0149203931282631	*	2741177.15699755	2741177.15699755	1	0.298974241077359
Tyr	C00082	WT-M	8581868.69502596	2559932.70086176	0.298295486896169	6483060.77217776	7828633.08898695	11433912.2239132	0.0625438929859054		8581868.69502596	4300667.14011875	1.99547382194963	0.595240835307025
Tyr	C00082	Atg7 KO-M	4300667.14011875	1351903.72678887	0.314347444883061	4512168.79068488	5534354.24746321	2855478.38220816	0.0625438929859054		4300667.14011875	4300667.14011875	1	0.314347444883061
U	C00299	WT-M	1880613.12463531	821486.463856935	0.43681842538254	1248977.46112667	1583554.70318824	2809307.20959102	0.043173494373876	*	1880613.12463531	1880613.12463531	1	0.43681842538254
U	C00299	Atg7 KO-M	7809582.04882893	3417579.96292883	0.437613682980808	11703006.3262125	5305385.96398024	6420353.85629402	0.043173494373876	*	7809582.04882893	1880613.12463531	4.15267869107495	1.81726901623723
UDP-Glc	C00029	WT-M	193386.472848086	96360.1829606313	0.498277783039802	233159.486514453	263493.662450417	83506.2695793877	0.361484916161351		193386.472848086	132086.701632186	1.46408737941384	0.729522213590885
UDP-Glc	C00029	Atg7 KO-M	132086.701632186	36797.1849924744	0.278583570774151	169112.496561841	131625.139457047	95522.4688776706	0.361484916161351		132086.701632186	132086.701632186	1	0.278583570774151
UDP-GlcNAc	C00043	WT-M	718364.166501667	270261.960948858	0.376218599912905	832205.135758118	913081.721177888	409805.642568996	0.585594038431139		718364.166501667	718364.166501667	1	0.376218599912905
UDP-GlcNAc	C00043	Atg7 KO-M	857624.08476796	304757.236553781	0.355350604030945	1206411.93728798	723693.088243107	642767.228772794	0.585594038431139		857624.08476796	718364.166501667	1.19385699448856	0.424237804118079
UMP	C00105	WT-M	2150009.2180339	236899.251394336	0.11018522590846	2171709.84370092	2375311.54110658	1903006.2692942	0.00358345626066239	**	2150009.2180339	915420.397524049	2.34865775751672	0.258787385593637
UMP	C00105	Atg7 KO-M	915420.397524049	255870.006643237	0.279510929989426	1209754.74465939	746006.215799819	790500.232112934	0.00358345626066239	**	915420.397524049	915420.397524049	1	0.279510929989426
Uracil	C00106	WT-M	6153126.79582495	2451653.03987447	0.398440194916506	8660003.71145792	6038669.78005466	3760706.89596227	0.641998107537875		6153126.79582495	6153126.79582495	1	0.398440194916506
Uracil	C00106	Atg7 KO-M	7250410.39069612	2884269.7044723	0.397807785911465	6520603.28229577	10429483.0792116	4801144.81058098	0.641998107537875		7250410.39069612	6153126.79582495	1.17832943010628	0.4687486216649
Uric acid	C00366	WT-M	7110929.74888106	1227550.95671494	0.172628756022811	7506727.53423872	8091754.50327191	5734307.20913255	0.63536552167767		7110929.74888106	7110929.74888106	1	0.172628756022811
Uric acid	C00366	Atg7 KO-M	7646576.42557674	1330965.85342708	0.174060361049317	8574448.51929953	8243658.82165436	6121621.93577632	0.63536552167767		7646576.42557674	7110929.74888106	1.07532723506092	0.187171846780868
Val	C00183	WT-M	18384493.724479	7428922.48174605	0.40408632367474	13021447.3646281	15267983.6562798	26864050.1525291	0.0579909757135806		18384493.724479	6678465.84934235	2.75280193673363	1.1123696144194
Val	C00183	Atg7 KO-M	6678465.84934235	2024719.7540334	0.303171386918565	7672826.62510314	8013749.66795941	4348821.2549645	0.0579909757135806		6678465.84934235	6678465.84934235	1	0.303171386918565
Xanthine	C00385	WT-M	2328368.0988978	906595.490896513	0.389369486433728	2726101.28465795	1290888.59243799	2968114.41959747	0.0356114700310262	*	2328368.0988978	2328368.0988978	1	0.389369486433728
Xanthine	C00385	Atg7 KO-M	6635077.83555977	2214335.96277893	0.333731723674967	5822460.34656643	9140915.90075971	4941857.25935318	0.0356114700310262	*	6635077.83555977	2328368.0988978	2.84966876100934	0.951024867514353
